# Supplementary material for: A Ti3C2Tx-Based Composite as Separator Coating for Stable Li-S Batteries
Source: MDPI journal article supplement (doi:10.3390/nano12213770), 2022-10-26
Supplement: s1 [file s1]

# Supplementary Materials

## A $\text{Ti}_3\text{C}_2\text{T}_x$ -Based Composite as Separator Coating for Stable Li-S Batteries

Ruowei Yi <sup>1,2</sup>, Yinchao Zhao <sup>3,4</sup>, Chenguang Liu <sup>3,4</sup>, Yi Sun <sup>3,4</sup>, Chun Zhao<sup>3</sup>,  
Yinqing Li <sup>5</sup>, Li Yang <sup>1,\*</sup>, Cezhou Zhao <sup>3,\*</sup>

<sup>1</sup> Department of Chemistry, Xi'an Jiaotong-Liverpool University, Suzhou 215123, China

<sup>2</sup> Stephenson Institute for Renewable Energy, Department of Chemistry, University of Liverpool, Liverpool L69 7ZD, UK

<sup>3</sup> Department of Electrical and Electronic Engineering, Xi'an Jiaotong-Liverpool University, Suzhou 215123, China

<sup>4</sup> Department of Electrical Engineering and Electronics, University of Liverpool, Liverpool L69 3GJ, UK

<sup>5</sup> Dongguan Hongde Battery Co., Ltd., Dongguan 523649, China

\* Correspondence: li.yang@xjtlu.edu.cn (L.Y.); cezhou.zhao@xjtlu.edu.cn (C.Z.)

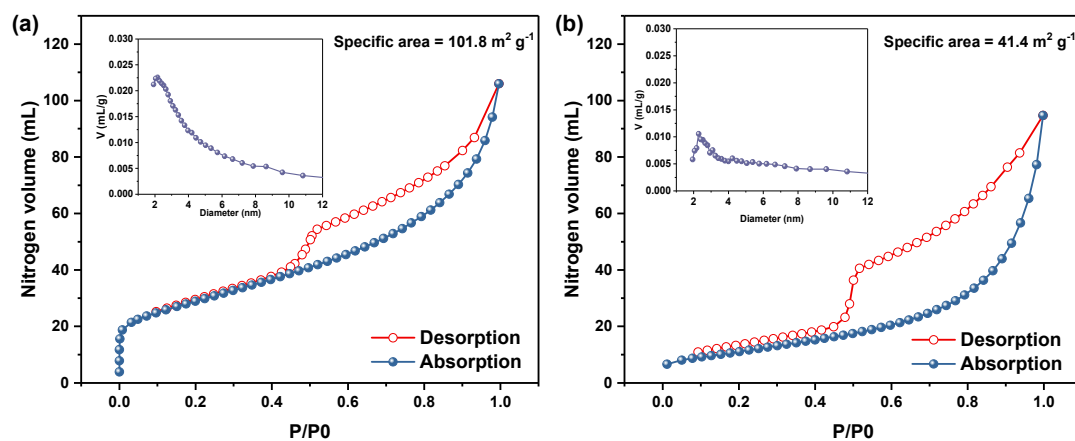

**Figure S1.** Nitrogen adsorption-desorption isotherm of (a) N-M@CNi and (b) MXene powder. The insert shows the pore size distribution acquired using the Barrett-Joyner-Halenda (BJH) method.

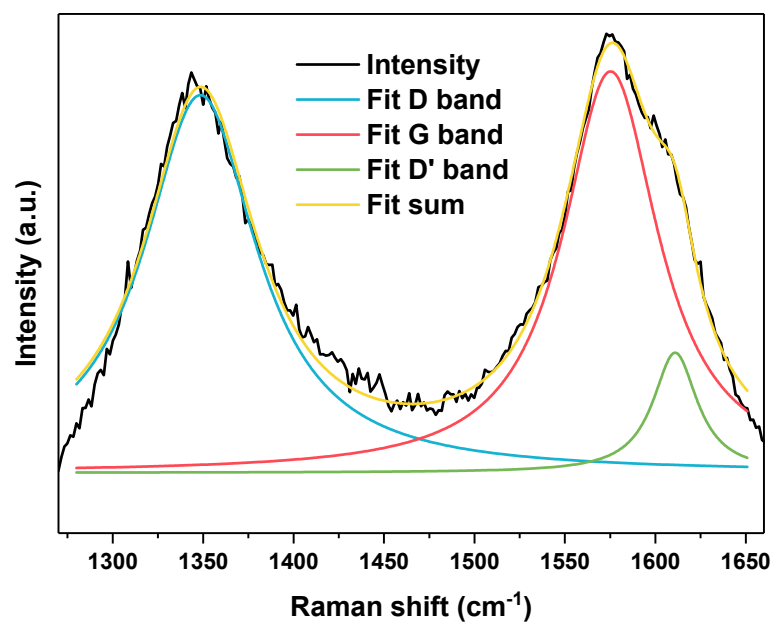

**Figure S2.** The fitting curves of the Raman spectrum of the carbon nanosheet part.

**Table S1.** The parameters of the fitting results from the fitting curves in Figure S2.

| Bands                      | D band   | G band   | D' band | R-Square (COD) | I <sub>D</sub> /I <sub>G</sub> |
|----------------------------|----------|----------|---------|----------------|--------------------------------|
| Center (cm <sup>-1</sup> ) | 1348.4   | 1575.2   | 1610.9  | 0.98           | 1.1                            |
| FWHM (cm <sup>-1</sup> )   | 75.8     | 64.2     | 29.9    |                |                                |
| Integrated area            | 310876.6 | 280035.7 | 39043.1 |                |                                |

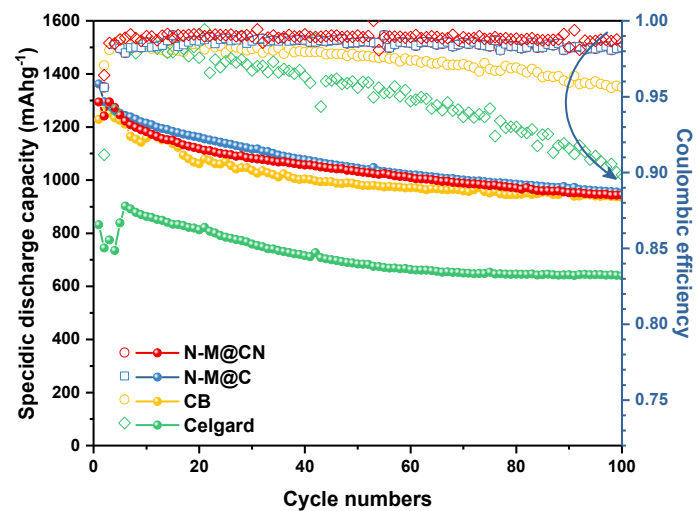

**Figure S3.** The cycling performance at 0.2 C current density of N-M@CNi, N-M@C, CB, and Celgard cells.

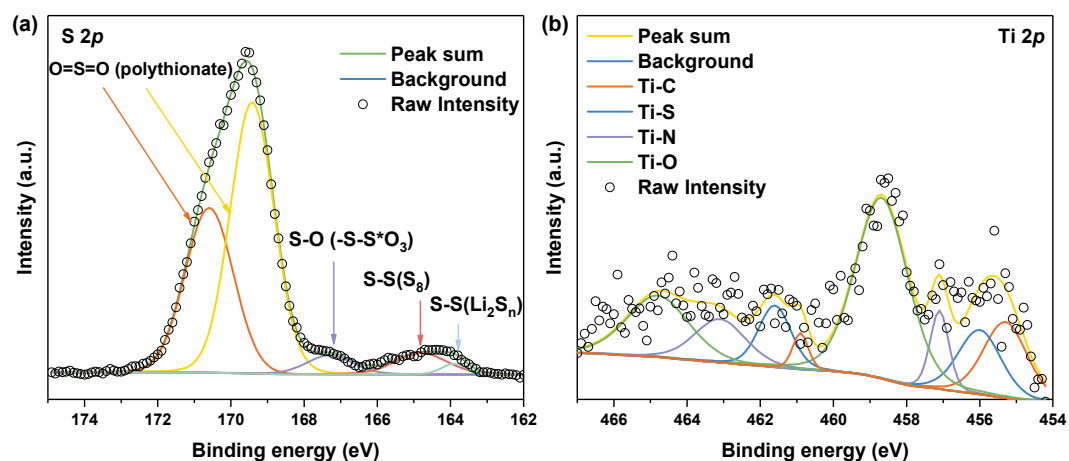

**Figure S4.** The deconvoluted XPS spectra of the cycled N-M@CNi separator: (a) S 2p and (b) Ti 2p. The adsorption of LiPS and the presence of the Ti-S bond are shown in the deconvoluted results.

**Table S2.** The performance comparison of Li-S batteries using MXene and/or N-doped carbon-based cathodic interlayer/separator coating from literatures.

| Composites                                                  | Sulfur area loading (mg cm <sup>-2</sup> ) and sulfur specie of the cathode | Specific capacity after cycling (mAh g <sup>-1</sup> ) | Current rate and cycle times | Ref.      |
|-------------------------------------------------------------|-----------------------------------------------------------------------------|--------------------------------------------------------|------------------------------|-----------|
| Ti <sub>3</sub> C <sub>2</sub> T <sub>x</sub>               | 1.2, S/CB                                                                   | 495                                                    | 1 C, 500 cycles              | [36]      |
| Ti <sub>3</sub> C <sub>2</sub>                              | 0.7–1, S/Ti <sub>3</sub> C <sub>2</sub>                                     | ~400                                                   | 0.5 C, 200 cycles            | [77]      |
|                                                             |                                                                             | ~360                                                   | 2 C, 200 cycles              |           |
| Ti <sub>3</sub> C <sub>2</sub> T <sub>x</sub> @Nafion       | 2, S/CB                                                                     | 415                                                    | 1 C, 1000 cycles             | [20]      |
| N-dope carbon nanofibers/SiO <sub>2</sub> /TiO <sub>2</sub> | 1.8, S/Ketjen black                                                         | 435                                                    | 1 C, 500 cycles              | [78]      |
| N, P-dual-doped carbon                                      | 1.6–2.0, S/acetylene black                                                  | 440                                                    | 1 C, 900 cycles              | [70]      |
| F, N-co-doped carbon                                        | 1.2, S/super-P                                                              | 640                                                    | 0.2 C, 500 cycles            | [79]      |
| N-M@CNi                                                     | 1.5, S                                                                      | 588                                                    | 1 C, 500 cycles              | This work |
|                                                             | 3.18, S                                                                     | 662                                                    | 0.2 C, 100 cycles            |           |
